# Supplementary material
Source: bioRxiv or medRxiv preprint supplement (https://medrxiv.org/highwire/filestream/81562/field_highwire_adjunct_files/4/2020.05.15.20101097-5.pdf)
Supplement: Supplementary file [file 2020.05.15.20101097-5.pdf]

|                                                          | <i>Stratification</i> | <b>Total cases</b> |      |                     | <b>Total deaths</b> |     |                     | <b>Cumulative cases (day 28)</b> |      |                     |
|----------------------------------------------------------|-----------------------|--------------------|------|---------------------|---------------------|-----|---------------------|----------------------------------|------|---------------------|
|                                                          |                       | <650               | ≥650 | Odds Ratio (95% CI) | <15                 | ≥15 | Odds Ratio (95% CI) | <100                             | ≥100 | Odds Ratio (95% CI) |
| <b>Weather</b><br>Atmospheric pressure at sea level, hPa | <1012                 | 21                 | 14   | 1 (ref)             | 22                  | 13  | 1 (ref)             | 21                               | 14   | 1 (ref)             |
|                                                          | ≥1012 to <1017        | 20                 | 8    | 0.60 (0.21-1.74)    | 21                  | 7   | 0.56 (0.19-1.69)    | 19                               | 9    | 0.71 (0.25-2.01)    |
|                                                          | ≥1017                 | 12                 | 16   | 2.00 (0.73-5.48)    | 11                  | 17  | 2.62 (0.94-7.27)    | 15                               | 13   | 1.30 (0.48-3.55)    |
| Precipitation, mm                                        | <1                    | 54                 | 56   | 1 (ref)             | 57                  | 53  | 1 (ref)             | 57                               | 52   | 1 (ref)             |
|                                                          | ≥1                    | 34                 | 41   | 1.16 (0.65-2.09)    | 30                  | 45  | 1.61 (0.89-2.92)    | 35                               | 40   | 1.25 (0.70-2.26)    |
| Average visibility, km                                   | <9.3                  | 22                 | 40   | 1 (ref)             | 24                  | 38  | 1 (ref)             | 29                               | 33   | 1 (ref)             |
|                                                          | ≥9.3 to <10.6         | 26                 | 36   | 0.76 (0.37-1.57)    | 24                  | 38  | 1.00 (0.49-2.06)    | 23                               | 38   | 1.45 (0.71-2.98)    |
|                                                          | ≥10.6                 | 40                 | 21   | 0.29 (0.14-0.61)    | 39                  | 22  | 0.36 (0.17-0.74)    | 40                               | 21   | 0.46 (0.22-0.95)    |
| Average wind speed                                       | <10.5                 | 28                 | 34   | 1 (ref)             | 27                  | 35  | 1 (ref)             | 31                               | 30   | 1 (ref)             |
|                                                          | ≥10.5 to <15.5        | 27                 | 32   | 0.98 (0.48-2.00)    | 29                  | 30  | 0.80 (0.39-1.63)    | 27                               | 32   | 1.22 (0.60-2.51)    |
|                                                          | ≥15.5                 | 33                 | 31   | 0.77 (0.38-1.56)    | 31                  | 33  | 0.82 (0.41-1.66)    | 34                               | 30   | 0.91 (0.45-1.84)    |
| Total days with snow                                     | 0                     | 72                 | 54   | 1 (ref)             | 70                  | 56  | 1 (ref)             | 72                               | 53   | 1 (ref)             |
|                                                          | >0                    | 16                 | 43   | 3.58 (1.83-7.03)    | 17                  | 42  | 3.09 (1.59-6.00)    | 20                               | 39   | 2.65 (1.39-5.05)    |
| Total days with thunderstorm                             | 0                     | 42                 | 54   | 1 (ref)             | 46                  | 50  | 1 (ref)             | 51                               | 45   | 1 (ref)             |
|                                                          | >0                    | 46                 | 43   | 0.73 (0.41-1.30)    | 41                  | 48  | 1.08 (0.60-1.92)    | 41                               | 47   | 1.30 (0.73-2.32)    |
| Total days with fog                                      | 0                     | 59                 | 47   | 1 (ref)             | 60                  | 46  | 1 (ref)             | 60                               | 45   | 1 (ref)             |
|                                                          | >0                    | 29                 | 50   | 2.16 (1.19-3.93)    | 27                  | 52  | 2.51 (1.37-4.59)    | 32                               | 47   | 1.96 (1.08-3.54)    |
| Sunshine, hours in first month of epidemic               | <150                  | 8                  | 37   | 1 (ref)             | 9                   | 36  | 1 (ref)             | 17                               | 28   | 1 (ref)             |
|                                                          | ≥150 to <220          | 14                 | 31   | 0.48 (0.18-1.29)    | 14                  | 31  | 0.55 (0.21-1.45)    | 18                               | 26   | 0.88 (0.37-2.05)    |
|                                                          | ≥220                  | 29                 | 18   | 0.13 (0.051-0.35)   | 26                  | 21  | 0.20 (0.080-0.51)   | 28                               | 19   | 0.41 (0.18-0.95)    |

|                                   | <i>Stratification</i> | <b>Total cases</b> |      |                     | <b>Total deaths</b> |     |                     | <b>Cumulative cases (day 28)</b> |      |                     |
|-----------------------------------|-----------------------|--------------------|------|---------------------|---------------------|-----|---------------------|----------------------------------|------|---------------------|
|                                   |                       | <650               | ≥650 | Odds Ratio (95% CI) | <15                 | ≥15 | Odds Ratio (95% CI) | <100                             | ≥100 | Odds Ratio (95% CI) |
| <b>Demographics</b><br>Median age | <27                   | 50                 | 18   | 1 (ref)             | 46                  | 22  | 1 (ref)             | 44                               | 21   | 1 (ref)             |
|                                   | ≥27 to <36            | 31                 | 34   | 3.05 (1.47-6.30)    | 35                  | 30  | 1.79 (0.89-3.62)    | 28                               | 37   | 2.77 (1.35-5.66)    |
|                                   | ≥36                   | 20                 | 48   | 6.67 (3.15-14.11)   | 18                  | 50  | 5.81 (2.77-12.18)   | 27                               | 41   | 3.18 (1.56-6.48)    |
| Age 0-14 years, %                 | <20                   | 9                  | 49   | 1 (ref)             | 11                  | 47  | 1 (ref)             | 23                               | 35   | 1 (ref)             |
|                                   | ≥20 to <31            | 26                 | 33   | 0.23 (0.10-0.56)    | 30                  | 29  | 0.23 (0.10-0.52)    | 24                               | 35   | 0.96 (0.46-2.01)    |
|                                   | ≥31                   | 46                 | 16   | 0.06 (0.03-0.16)    | 41                  | 21  | 0.12 (0.050-0.28)   | 38                               | 21   | 0.36 (0.17-0.77)    |
| Age 15-64 years, %                | <63                   | 43                 | 17   | 1 (ref)             | 36                  | 24  | 1 (ref)             | 38                               | 19   | 1 (ref)             |
|                                   | ≥63 to <66.5          | 20                 | 39   | 4.93 (2.26-10.74)   | 23                  | 36  | 2.35 (1.13-4.90)    | 24                               | 35   | 2.92 (1.37-6.22)    |
|                                   | ≥66.5                 | 18                 | 42   | 5.90 (2.69-12.97)   | 23                  | 37  | 2.41 (1.16-5.02)    | 23                               | 37   | 3.22 (1.51-6.86)    |
| Age over 65 years, %              | <4.5                  | 46                 | 16   | 1 (ref)             | 44                  | 18  | 1 (ref)             | 39                               | 20   | 1 (ref)             |
|                                   | ≥4.5 to <11           | 26                 | 31   | 3.43 (1.58-7.41)    | 29                  | 28  | 2.36 (1.11-5.02)    | 24                               | 33   | 2.68 (1.26-5.69)    |
|                                   | ≥11                   | 9                  | 51   | 16.29 (6.57-40.42)  | 9                   | 51  | 13.85 (5.65-33.94)  | 22                               | 38   | 3.37 (1.59-7.15)    |

|                                          |                  |                       |      |                     |                     |     |                     |                                  |      |                     |
|------------------------------------------|------------------|-----------------------|------|---------------------|---------------------|-----|---------------------|----------------------------------|------|---------------------|
| Sex ratio                                | <0.97            | 29                    | 31   | 1 (ref)             | 30                  | 30  | 1 (ref)             | 31                               | 29   | 1 (ref)             |
|                                          | ≥0.97 to <1.01   | 40                    | 37   | 0.87 (0.44-1.70)    | 34                  | 43  | 1.26 (0.64-2.49)    | 36                               | 40   | 1.19 (0.60-2.34)    |
|                                          | ≥1.01            | 32                    | 32   | 0.94 (0.46-1.89)    | 35                  | 29  | 0.83 (0.41-1.68)    | 33                               | 30   | 0.97 (0.48-1.97)    |
| Population density, pop/km <sup>2</sup>  | <50              | 40                    | 28   | 1 (ref)             | 38                  | 30  | 1 (ref)             | 41                               | 26   | 1 (ref)             |
|                                          | ≥50 to <140      | 23                    | 44   | 2.73 (1.36-5.49)    | 24                  | 43  | 2.27 (1.14-4.53)    | 23                               | 43   | 2.95 (1.46-5.97)    |
|                                          | ≥140             | 42                    | 28   | 0.95 (0.48-1.88)    | 41                  | 29  | 0.90 (0.46-1.76)    | 39                               | 30   | 1.21 (0.61-2.40)    |
| GDP                                      | <10000           | 49                    | 18   | 1 (ref)             | 46                  | 21  | 1 (ref)             | 39                               | 25   | 1 (ref)             |
|                                          | ≥10000 to <31000 | 30                    | 38   | 3.45 (1.68-7.10)    | 31                  | 37  | 2.61 (1.29-5.28)    | 31                               | 37   | 1.86 (0.93-3.72)    |
|                                          | ≥31000           | 23                    | 44   | 5.21 (2.49-10.90)   | 24                  | 43  | 3.92 (1.91-8.05)    | 30                               | 37   | 1.92 (0.96-3.86)    |
|                                          |                  | <b>Total cases</b>    |      |                     | <b>Total deaths</b> |     |                     | <b>Cumulative cases (day 28)</b> |      |                     |
|                                          |                  | <650                  | ≥650 | Odds Ratio (95% CI) | <15                 | ≥15 | Odds Ratio (95% CI) | <100                             | ≥100 | Odds Ratio (95% CI) |
| <b>Health</b>                            |                  | <b>Stratification</b> |      |                     |                     |     |                     |                                  |      |                     |
| Diabetic, %                              | <6               | 34                    | 32   | 1 (ref)             | 32                  | 34  | 1 (ref)             | 35                               | 29   | 1 (ref)             |
|                                          | ≥6 to <9         | 22                    | 35   | 1.69 (0.82-3.47)    | 21                  | 36  | 1.61 (0.78-3.32)    | 22                               | 35   | 1.92 (0.93-3.97)    |
|                                          | ≥9               | 37                    | 32   | 0.92 (0.47-1.81)    | 40                  | 29  | 0.68 (0.35-1.35)    | 38                               | 30   | 0.95 (0.48-1.89)    |
| Cigarette consumption, annual per capita | <340             | 39                    | 17   | 1 (ref)             | 34                  | 22  | 1 (ref)             | 36                               | 20   | 1 (ref)             |
|                                          | ≥340 to <1100    | 26                    | 31   | 2.74 (1.26-5.92)    | 31                  | 26  | 1.30 (0.61-2.74)    | 30                               | 25   | 1.50 (0.70-3.21)    |
|                                          | ≥1100            | 7                     | 50   | 16.39 (6.18-43.43)  | 8                   | 49  | 9.47 (3.77-23.75)   | 13                               | 44   | 6.09 (2.67-13.91)   |
| Physicians, per 100,000 population       | <90              | 44                    | 17   | 1 (ref)             | 41                  | 20  | 1 (ref)             | 40                               | 19   | 1 (ref)             |
|                                          | ≥90 to <240      | 28                    | 30   | 2.77 (1.30-5.93)    | 32                  | 26  | 1.67 (0.79-3.51)    | 24                               | 34   | 2.98 (1.40-6.35)    |
|                                          | ≥240             | 10                    | 51   | 13.20 (5.48-31.79)  | 10                  | 51  | 10.46 (4.41-24.79)  | 21                               | 40   | 4.01 (1.88-8.57)    |
| Health expenditure, US\$ per capita      | <350             | 44                    | 14   | 1 (ref)             | 40                  | 18  | 1 (ref)             | 39                               | 16   | 1 (ref)             |
|                                          | ≥350 to <1400    | 25                    | 36   | 4.53 (2.06-9.96)    | 27                  | 34  | 2.8 (1.32-5.93)     | 24                               | 37   | 3.76 (1.73-8.17)    |
|                                          | ≥1400            | 10                    | 46   | 14.46 (5.82-35.94)  | 12                  | 44  | 8.15 (3.49-19.00)   | 21                               | 35   | 4.06 (1.84-8.99)    |
| COVID-19 tests, per 100,000 population   | <300             | 13                    | 18   | 1 (ref)             | 11                  | 20  | 1 (ref)             | 16                               | 15   | 1 (ref)             |
|                                          | ≥300 to <1500    | 8                     | 27   | 2.44 (0.84-7.06)    | 8                   | 27  | 1.86 (0.63-5.46)    | 8                                | 27   | 3.60 (1.25-10.37)   |
|                                          | ≥1500            | 4                     | 32   | 5.78 (1.64-20.38)   | 7                   | 29  | 2.28 (0.75-6.88)    | 12                               | 24   | 2.13 (0.79-5.73)    |
|                                          |                  | <b>Total cases</b>    |      |                     | <b>Total deaths</b> |     |                     | <b>Cumulative cases (day 28)</b> |      |                     |
|                                          |                  | <650                  | ≥650 | Odds Ratio (95% CI) | <15                 | ≥15 | Odds Ratio (95% CI) | <100                             | ≥100 | Odds Ratio (95% CI) |
| <b>Geographic (weather station)</b>      |                  | <b>Stratification</b> |      |                     |                     |     |                     |                                  |      |                     |
| Latitude                                 | <10              | 39                    | 21   | 1 (ref)             | 36                  | 24  | 1 (ref)             | 36                               | 23   | 1 (ref)             |
|                                          | ≥10 to <34       | 40                    | 23   | 1.07 (0.51-2.23)    | 41                  | 22  | 0.80 (0.39-1.67)    | 39                               | 24   | 0.96 (0.46-2.00)    |
|                                          | ≥34              | 9                     | 53   | 10.94 (4.52-26.46)  | 10                  | 52  | 7.80 (3.33-18.27)   | 17                               | 45   | 4.14 (1.93-8.90)    |
|                                          |                  | <b>Total cases</b>    |      |                     | <b>Total deaths</b> |     |                     | <b>Cumulative cases (day 28)</b> |      |                     |
|                                          |                  | <650                  | ≥650 | Odds Ratio (95% CI) | <15                 | ≥15 | Odds Ratio (95% CI) | <100                             | ≥100 | Odds Ratio (95% CI) |
| <b>Planetary</b>                         |                  | <b>Stratification</b> |      |                     |                     |     |                     |                                  |      |                     |
| Ozone exposure, ppb                      | <46              | 40                    | 24   | 1 (ref)             | 36                  | 28  | 1 (ref)             | 35                               | 28   | 1 (ref)             |
|                                          | ≥46 to <56       | 28                    | 35   | 2.08 (1.03-4.23)    | 30                  | 33  | 1.41 (0.70-2.84)    | 31                               | 30   | 1.21 (0.60-2.45)    |
|                                          | ≥56              | 14                    | 40   | 4.76 (2.16-10.51)   | 17                  | 37  | 2.80 (1.31-5.97)    | 20                               | 34   | 2.13 (1.01-4.47)    |

**Supplementary Table 2. Odds of COVID-19 outcomes (cases, deaths, and epidemic growth rate) by weather, demographic, health, geographic, and planetary factors.**
